# Supplementary material
Source: publisher figshare collection journal article supplement (https://karger.figshare.com/ndownloader/files/15591839)
Supplement: Supplementary file 1 [file 15591839]

**Supplementary figures**

**
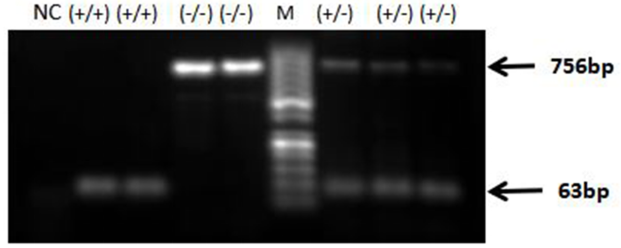
**

**Figure S1.** Genotype identification

NC: negative control( 1μL ddH20 is used as a substitute for 1μL template);

M: marker; (+/+): wild type； (-/-)：homozygote (KO mice)； (+/-)：heterozygote

**
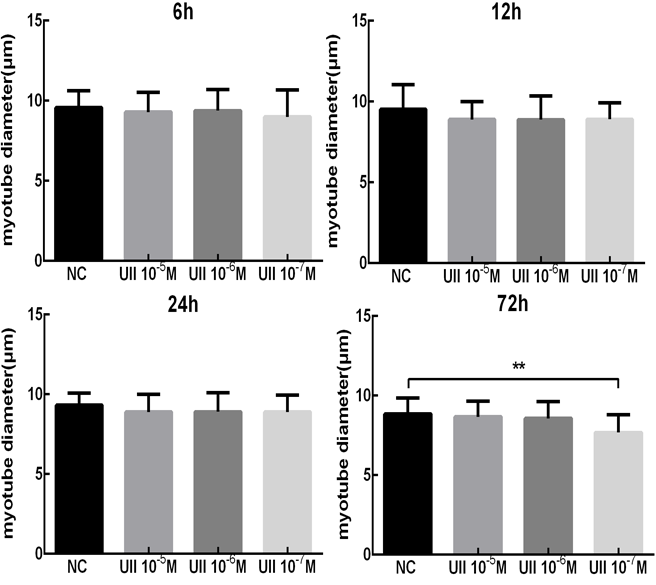
**

**Figure S2.** The effect of different UII concentrations (10-5M-10-7M ) exposed for 6,12, 24,72h on myotube diameters (***p*＜0.01 compared with NC ). NC : Normal control


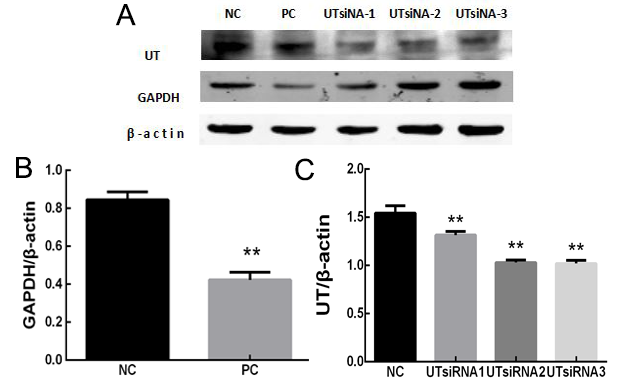


**Figure S3.** The effect of UT siRNA transfection on UT expression in C2C12 cells.

A: NC: Nontarget siRNA as negative control. PC: GAPDH-specific siRNA as positive control. B: GAPDH expression was significantly interfered by GAPDH-specific siRNA compared to NC group (***p*＜0.01). C: UT expression was significantly interfered by UT-specific siRNA compared to NC group (***p*＜0.01).
